# Supplementary material for: Extrapolated longer-term effects of the DAPA-CKD trial: a modelling analysis
Source: PubMed Central journal article supplement — Nephrol Dial Transplant. 2022 Oct 6;38(5):1260–70. doi: 10.1093/ndt/gfac280 (PMC10157747; doi:10.1093/ndt/gfac280), 2022-10-06
Supplement: gfac280_supplemental_file.pdf [file gfac280_supplemental_file.pdf]

## SUPPLEMENTAL TABLES

*Table S1. Patient Profile*

| Variable                        | Mean (SE)                       | Distribution  |        |
|---------------------------------|---------------------------------|---------------|--------|
| <b>Patient characteristics</b>  | Age (years)                     | 61.84 (0.18)  | Normal |
|                                 | Female                          | 0.33 (0.01)   | Beta   |
|                                 | BMI (kg/m <sup>2</sup> )        | 29.52 (0.09)  | Normal |
|                                 | Race: Black or African American | 0.04 (0.00)   | Beta   |
|                                 | Race: Other                     | 0.08 (0.00)   | Beta   |
|                                 | Race: White                     | 0.53 (0.01)   | Beta   |
|                                 | Smoker                          | 0.14 (0.01)   | Beta   |
| <b>Clinical characteristics</b> | CKD 1                           | 0.00 (0.00)   | Beta   |
|                                 | CKD 2                           | 0.11 (0.00)   | Beta   |
|                                 | CKD 3a                          | 0.31 (0.01)   | Beta   |
|                                 | CKD 3b                          | 0.44 (0.01)   | Beta   |
|                                 | CKD 4                           | 0.14 (0.01)   | Beta   |
|                                 | CKD 5 (pre-RRT)                 | 0.00 (0.00)   | Beta   |
|                                 | Dialysis                        | 0.00 (0.00)   | Beta   |
|                                 | Transplant                      | 0.00 (0.00)   | Beta   |
|                                 | UACR: 30-300 mg/g               | 0.10 (0.00)   | Beta   |
|                                 | UACR: ≥ 300 mg/g                | 0.90 (0.00)   | Beta   |
|                                 | Type 2 diabetes                 | 0.68 (0.01)   | Beta   |
|                                 | Glomerulonephritis              | 0.16 (0.01)   | Beta   |
|                                 | ACEi                            | 0.27 (0.01)   | Beta   |
|                                 | ARB                             | 0.56 (0.01)   | Beta   |
|                                 | MRA                             | 0.05 (0.00)   | Beta   |
|                                 | Diuretic                        | 0.37 (0.01)   | Beta   |
|                                 | Potassium                       | 4.65 (0.01)   | Normal |
|                                 | Systolic blood pressure         | 137.08 (0.27) | Normal |
|                                 | Haemoglobin                     | 12.83 (0.03)  | Normal |
| <b>Patient history</b>          | Prior HF                        | 0.11 (0.00)   | Beta   |
|                                 | Prior MI                        | 0.09 (0.00)   | Beta   |
|                                 | Prior Stroke                    | 0.07 (0.00)   | Beta   |

ACEi: angiotensin-converting enzyme inhibitors; ARB: Angiotensin receptor blockers; BMI: body mass index; CKD: chronic kidney disease; HF: heart failure; MI: myocardial infarction; MRA: mineralocorticoid receptor antagonists; KRT: kidney replacement therapy; SE: standard error; UACR: urine albumin-to-creatinine ratio

## SUPPLEMENTAL FIGURES

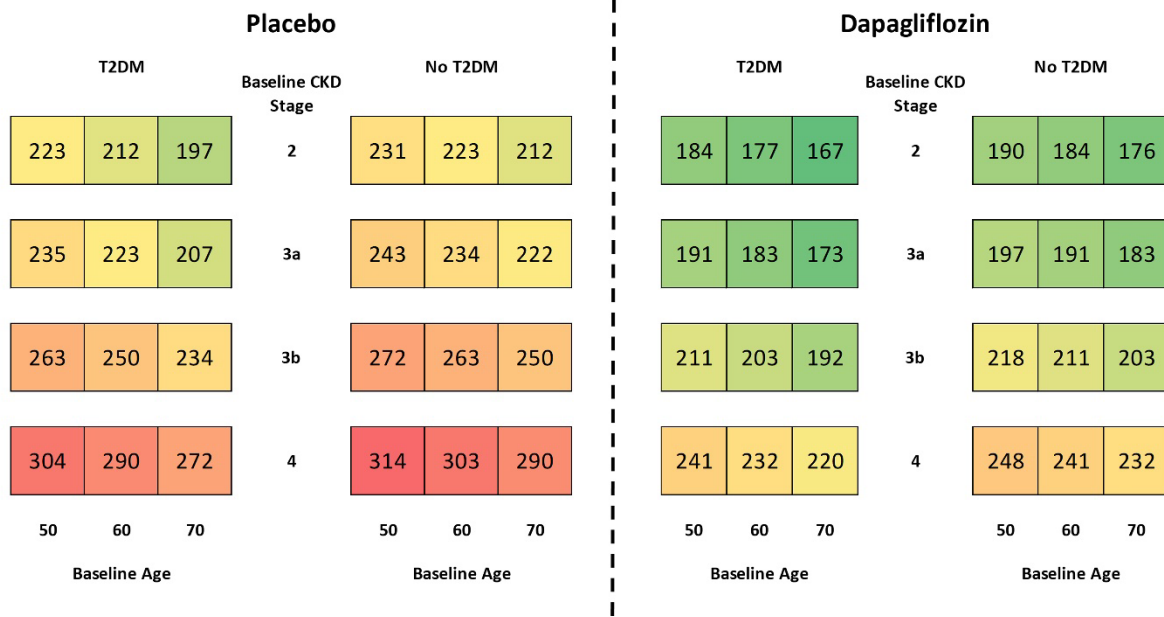

Figure S1. Cumulative incidence of initiation of dialysis per 1,000 patients treated with placebo versus dapagliflozin, in addition to standard therapy, over a 10 year horizon  
 CKD: chronic kidney disease; KRT: kidney transplant therapy; T2DM: type 2 diabetes mellitus

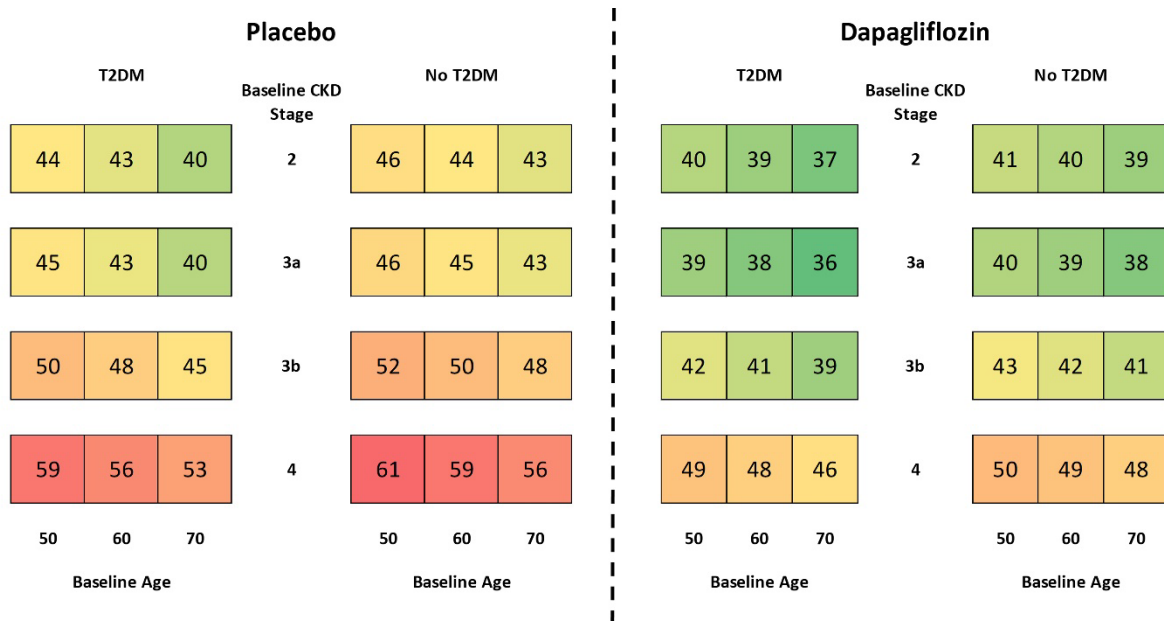

Figure S2. Cumulative incidence of kidney transplants per 1,000 patients treated with placebo versus dapagliflozin, in addition to standard therapy, over a 10 year horizon  
 CKD: chronic kidney disease; KRT: kidney transplant therapy; T2DM: type 2 diabetes mellitus

|                           | Placebo      |     |     |                       |              |     | Dapagliflozin |      |              |     |                       |         |              |     |  |
|---------------------------|--------------|-----|-----|-----------------------|--------------|-----|---------------|------|--------------|-----|-----------------------|---------|--------------|-----|--|
|                           | T2DM         |     |     | Baseline<br>CKD Stage | No T2DM      |     |               | T2DM |              |     | Baseline<br>CKD Stage | No T2DM |              |     |  |
|                           | 50           | 60  | 70  |                       | 50           | 60  | 70            | 50   | 60           | 70  |                       | 50      | 60           | 70  |  |
| <b>Overall population</b> | 298          | 354 | 425 | 2                     | 255          | 298 | 355           | 232  | 280          | 342 | 2                     | 196     | 232          | 280 |  |
| <b>Prior HF</b>           | 432          | 519 | 619 |                       | 367          | 441 | 530           | 348  | 427          | 521 |                       | 291     | 356          | 437 |  |
| <b>No Prior HF</b>        | 284          | 336 | 403 |                       | 249          | 289 | 343           | 220  | 265          | 322 |                       | 190     | 225          | 270 |  |
| <b>Overall population</b> | 308          | 364 | 434 | 3a                    | 265          | 308 | 364           | 237  | 285          | 347 | 3a                    | 201     | 237          | 285 |  |
| <b>Prior HF</b>           | 442          | 529 | 628 |                       | 377          | 451 | 539           | 354  | 433          | 527 |                       | 296     | 361          | 443 |  |
| <b>No Prior HF</b>        | 294          | 346 | 413 |                       | 258          | 299 | 353           | 225  | 270          | 328 |                       | 195     | 229          | 275 |  |
| <b>Overall population</b> | 331          | 385 | 454 | 3b                    | 290          | 331 | 386           | 252  | 299          | 361 | 3b                    | 216     | 252          | 300 |  |
| <b>Prior HF</b>           | 461          | 545 | 640 |                       | 398          | 470 | 555           | 367  | 445          | 538 |                       | 310     | 375          | 455 |  |
| <b>No Prior HF</b>        | 318          | 368 | 433 |                       | 283          | 323 | 375           | 240  | 284          | 342 |                       | 211     | 245          | 290 |  |
| <b>Overall population</b> | 365          | 417 | 482 | 4                     | 326          | 366 | 418           | 275  | 321          | 380 | 4                     | 240     | 275          | 322 |  |
| <b>Prior HF</b>           | 489          | 569 | 658 |                       | 429          | 497 | 578           | 387  | 463          | 552 |                       | 332     | 394          | 472 |  |
| <b>No Prior HF</b>        | 353          | 401 | 462 |                       | 319          | 357 | 407           | 264  | 306          | 362 |                       | 235     | 268          | 312 |  |
|                           | 50           | 60  | 70  |                       | 50           | 60  | 70            | 50   | 60           | 70  |                       | 50      | 60           | 70  |  |
|                           | Baseline Age |     |     |                       | Baseline Age |     |               |      | Baseline Age |     |                       |         | Baseline Age |     |  |

Figure S3. Cumulative incidence of all-cause mortality per 1,000 patients treated with placebo versus dapagliflozin, in addition to standard therapy, over a 10 year horizon - stratified by history of HF

CKD: chronic kidney disease; HF: heart failure; KRT: kidney transplant therapy; T2DM: type 2 diabetes mellitus

|                           | Placebo      |     |     |                       |              |     | Dapagliflozin |      |              |     |                       |         |              |     |  |
|---------------------------|--------------|-----|-----|-----------------------|--------------|-----|---------------|------|--------------|-----|-----------------------|---------|--------------|-----|--|
|                           | T2DM         |     |     | Baseline<br>CKD Stage | No T2DM      |     |               | T2DM |              |     | Baseline<br>CKD Stage | No T2DM |              |     |  |
|                           | 50           | 60  | 70  |                       | 50           | 60  | 70            | 50   | 60           | 70  |                       | 50      | 60           | 70  |  |
| <b>Overall population</b> | 268          | 254 | 237 | 2                     | 277          | 267 | 254           | 224  | 216          | 204 | 2                     | 231     | 224          | 215 |  |
| <b>Prior HF</b>           | 236          | 214 | 188 |                       | 251          | 233 | 211           | 203  | 188          | 170 |                       | 214     | 201          | 186 |  |
| <b>No Prior HF</b>        | 271          | 259 | 243 |                       | 279          | 270 | 257           | 226  | 218          | 208 |                       | 232     | 226          | 217 |  |
| <b>Overall population</b> | 280          | 266 | 248 | 3a                    | 290          | 279 | 265           | 230  | 221          | 209 | 3a                    | 237     | 230          | 221 |  |
| <b>Prior HF</b>           | 246          | 222 | 195 |                       | 262          | 243 | 220           | 207  | 192          | 172 |                       | 219     | 206          | 190 |  |
| <b>No Prior HF</b>        | 283          | 270 | 253 |                       | 292          | 282 | 268           | 232  | 224          | 212 |                       | 238     | 231          | 223 |  |
| <b>Overall population</b> | 313          | 298 | 279 | 3b                    | 324          | 313 | 298           | 254  | 244          | 231 | 3b                    | 261     | 254          | 244 |  |
| <b>Prior HF</b>           | 277          | 252 | 222 |                       | 295          | 274 | 249           | 230  | 213          | 192 |                       | 242     | 228          | 211 |  |
| <b>No Prior HF</b>        | 317          | 303 | 285 |                       | 326          | 315 | 301           | 256  | 247          | 235 |                       | 262     | 255          | 246 |  |
| <b>Overall population</b> | 362          | 347 | 326 | 4                     | 374          | 362 | 346           | 290  | 280          | 266 | 4                     | 298     | 290          | 279 |  |
| <b>Prior HF</b>           | 324          | 297 | 265 |                       | 343          | 321 | 294           | 264  | 246          | 223 |                       | 277     | 262          | 244 |  |
| <b>No Prior HF</b>        | 366          | 352 | 332 |                       | 376          | 365 | 350           | 293  | 283          | 270 |                       | 299     | 292          | 282 |  |
|                           | 50           | 60  | 70  |                       | 50           | 60  | 70            | 50   | 60           | 70  |                       | 50      | 60           | 70  |  |
|                           | Baseline Age |     |     |                       | Baseline Age |     |               |      | Baseline Age |     |                       |         | Baseline Age |     |  |

Figure S4. Cumulative incidence of KRT initiation per 1,000 patients treated with placebo versus dapagliflozin, in addition to standard therapy, over a 10 year horizon - stratified by history of HF

CKD: chronic kidney disease; HF: heart failure; KRT: kidney transplant therapy; T2DM: type 2 diabetes mellitus

|                           | Placebo      |     |     |                       |              |     | Dapagliflozin |      |              |     |                       |         |              |    |     |
|---------------------------|--------------|-----|-----|-----------------------|--------------|-----|---------------|------|--------------|-----|-----------------------|---------|--------------|----|-----|
|                           | T2DM         |     |     | Baseline<br>CKD Stage | No T2DM      |     |               | T2DM |              |     | Baseline<br>CKD Stage | No T2DM |              |    |     |
|                           | 50           | 60  | 70  |                       | 50           | 60  | 70            | 50   | 60           | 70  |                       | 50      | 60           | 70 |     |
| <b>Overall population</b> | 47           | 72  | 109 | 2                     | 16           | 25  | 39            | 2    | 31           | 48  | 73                    | 2       | 11           | 17 | 26  |
| <b>Prior HF</b>           | 199          | 296 | 430 |                       | 76           | 115 | 171           |      | 134          | 202 | 298                   |         | 51           | 78 | 117 |
| <b>No Prior HF</b>        | 38           | 59  | 89  |                       | 14           | 22  | 34            |      | 25           | 39  | 60                    |         | 9            | 15 | 23  |
| <b>Overall population</b> | 48           | 74  | 112 | 3a                    | 17           | 26  | 40            | 3a   | 32           | 49  | 75                    | 3a      | 11           | 17 | 27  |
| <b>Prior HF</b>           | 204          | 304 | 441 |                       | 78           | 119 | 176           |      | 137          | 206 | 303                   |         | 52           | 80 | 119 |
| <b>No Prior HF</b>        | 39           | 60  | 92  |                       | 15           | 23  | 35            |      | 26           | 40  | 61                    |         | 10           | 15 | 23  |
| <b>Overall population</b> | 49           | 76  | 115 | 3b                    | 17           | 27  | 41            | 3b   | 33           | 50  | 77                    | 3b      | 11           | 18 | 27  |
| <b>Prior HF</b>           | 210          | 313 | 454 |                       | 81           | 122 | 181           |      | 141          | 212 | 312                   |         | 54           | 82 | 123 |
| <b>No Prior HF</b>        | 40           | 62  | 95  |                       | 15           | 23  | 36            |      | 27           | 41  | 63                    |         | 10           | 15 | 24  |
| <b>Overall population</b> | 51           | 79  | 120 | 4                     | 18           | 28  | 43            | 4    | 34           | 52  | 80                    | 4       | 12           | 18 | 29  |
| <b>Prior HF</b>           | 220          | 327 | 477 |                       | 84           | 128 | 190           |      | 147          | 221 | 326                   |         | 56           | 85 | 128 |
| <b>No Prior HF</b>        | 42           | 65  | 99  |                       | 16           | 24  | 38            |      | 28           | 43  | 66                    |         | 10           | 16 | 25  |
|                           | 50           | 60  | 70  |                       | 50           | 60  | 70            |      | 50           | 60  | 70                    |         | 50           | 60 | 70  |
|                           | Baseline Age |     |     |                       | Baseline Age |     |               |      | Baseline Age |     |                       |         | Baseline Age |    |     |

Figure S5. Cumulative incidence of HHF per 1,000 patients treated with placebo versus dapagliflozin, in addition to standard therapy, over a 10 year horizon - stratified by history of HF

CKD: chronic kidney disease; HF: heart failure; KRT: kidney transplant therapy; T2DM: type 2 diabetes mellitus

|                           | Placebo      |     |     |                       |              |     | Dapagliflozin |      |              |     |                       |         |              |     |  |
|---------------------------|--------------|-----|-----|-----------------------|--------------|-----|---------------|------|--------------|-----|-----------------------|---------|--------------|-----|--|
|                           | T2DM         |     |     | Baseline<br>CKD Stage | No T2DM      |     |               | T2DM |              |     | Baseline<br>CKD Stage | No T2DM |              |     |  |
|                           | 50           | 60  | 70  |                       | 50           | 60  | 70            | 50   | 60           | 70  |                       | 50      | 60           | 70  |  |
| <b>Overall population</b> | 198          | 190 | 181 | 2                     | 132          | 129 | 124           | 158  | 153          | 147 | 2                     | 105     | 103          | 100 |  |
| <b>Prior HF</b>           | 350          | 326 | 296 |                       | 247          | 234 | 217           | 285  | 270          | 250 |                       | 199     | 191          | 180 |  |
| <b>No Prior HF</b>        | 182          | 176 | 168 |                       | 125          | 122 | 118           | 145  | 141          | 136 |                       | 99      | 97           | 94  |  |
| <b>Overall population</b> | 204          | 196 | 186 | 3a                    | 137          | 133 | 128           | 160  | 156          | 149 | 3a                    | 107     | 104          | 101 |  |
| <b>Prior HF</b>           | 361          | 335 | 303 |                       | 255          | 241 | 223           | 290  | 273          | 252 |                       | 202     | 194          | 182 |  |
| <b>No Prior HF</b>        | 188          | 181 | 173 |                       | 129          | 126 | 121           | 147  | 143          | 138 |                       | 101     | 99           | 96  |  |
| <b>Overall population</b> | 221          | 213 | 202 | 3b                    | 148          | 144 | 139           | 172  | 167          | 160 | 3b                    | 115     | 112          | 109 |  |
| <b>Prior HF</b>           | 392          | 364 | 331 |                       | 276          | 262 | 243           | 311  | 294          | 271 |                       | 217     | 208          | 196 |  |
| <b>No Prior HF</b>        | 204          | 197 | 188 |                       | 140          | 136 | 132           | 158  | 154          | 148 |                       | 108     | 106          | 103 |  |
| <b>Overall population</b> | 249          | 240 | 229 | 4                     | 166          | 162 | 157           | 191  | 186          | 179 | 4                     | 127     | 125          | 121 |  |
| <b>Prior HF</b>           | 443          | 414 | 378 |                       | 312          | 296 | 276           | 347  | 328          | 304 |                       | 242     | 232          | 219 |  |
| <b>No Prior HF</b>        | 229          | 222 | 212 |                       | 157          | 154 | 148           | 176  | 171          | 165 |                       | 120     | 118          | 115 |  |
|                           | 50           | 60  | 70  |                       | 50           | 60  | 70            | 50   | 60           | 70  |                       | 50      | 60           | 70  |  |
|                           | Baseline Age |     |     |                       | Baseline Age |     |               |      | Baseline Age |     |                       |         | Baseline Age |     |  |

Figure S6. Cumulative incidence of abrupt declines in kidney function per 1,000 patients treated with placebo versus dapagliflozin, in addition to standard therapy, over a 10 year horizon - stratified by history of HF

CKD: chronic kidney disease; HF: heart failure; KRT: kidney transplant therapy; T2DM: type 2 diabetes mellitus
